# Supplementary material for: Safety signals of amide local anesthetics in dentistry: a real-world data analysis
Source: Research Square preprint supplement (doi:10.21203/rs.3.rs-8374189/v1), 2026-01-20
Supplement: Supplementary file 1 [file 14489ee49af6343dd6f5f038.docx]

**Safety signals of amide local anesthetics in dentistry: a real-world data analysis**

**Supplementary material**

**Appendix 1**

The reporting odds ratio (ROR) can be expressed as

𝑅𝑂𝑅 = =

The 95% confidence interval can be calculated by

95% 𝐶𝐼 =

Table A1. Two-by-two contingency table for the ROR calculation

|  | Drug of interest | Other drugs |
| --- | --- | --- |
| Adverse event of interest in dental practice | a | b |
| Other adverse events in dental practice | c | d |

**Appendix 2**

**GATHER Checklist**

| **Item #** | **Checklist item** | **Reported on page #** |
| --- | --- | --- |
| **Objectives and funding** | | |
| 1 | Define the indicator(s), populations (including age, sex, and geographic entities), and time period(s) for which estimates were made. | 5-6 |
| 2 | List the funding sources for the work. | 17 |
| **Data inputs** | | |
| For all data inputs from multiple sources that are synthesised as part of the study: | | |
| 3 | Describe how the data were identified and how the data were accessed. | 5-6 |
| 4 | Specify the inclusion and exclusion criteria. Identify all ad-hoc exclusions. | 5-6 |
| 5 | Provide information about all included data sources and their main characteristics. For each data source used, report reference information or contact name/institution, population represented, data collection method, year(s) of data collection, sex and age range, diagnostic criteria or measurement method, and sample size, as relevant. | 6-7 |
| 6 | Identify and describe any categories of input data that have potentially important biases (eg, based on characteristics listed in item 5). | 10-13 |
| For data inputs that contribute to the analysis but were not synthesised as part of the study: | | |
| 7 | Describe and give sources for any other data inputs. | 11-13 |
| For all data inputs: | | |
| 8 | Provide all data inputs in a file format from which data can be efficiently extracted (eg, a spreadsheet rather than a PDF), including all relevant meta-data listed in item 5. For any data inputs that cannot be shared because of ethical or legal reasons, such as third-party ownership, provide a contact name or the name of the institution that retains the right to the data. | 5-6, 17 |
| **Data analysis** | | |
| 9 | Provide a conceptual overview of the data analysis method. A diagram may be helpful. | 5-6 |
| 10 | Provide a detailed description of all steps of the analysis, including mathematical formulae. This description should cover, as relevant, data cleaning, data pre-processing, data adjustments and weighting of data sources, and mathematical or statistical model(s). | 5-6 |
| 11 | Describe how candidate models were evaluated and how the final model(s) were selected. | 5-6 |
| 12 | Provide the results of an evaluation of model performance, if done, as well as the results of any relevant sensitivity analysis. | 5-7 |
| 13 | Describe methods of calculating uncertainty of the estimates. State which sources of uncertainty were, and were not, accounted for in the uncertainty analysis. | 5-6, Appendix 1 |
| 14 | State how analytical or statistical source code used to generate estimates can be accessed. | Appendix 1 |
| **Results and discussion** | | |
| 15 | Provide published estimates in a file format from which data can be efficiently extracted. | - |
| 16 | Report a quantitative measure of the uncertainty of the estimates (eg, uncertainty intervals). | 5-6 |
| 17 | Interpret results in light of existing evidence. If updating a previous set of estimates, describe the reasons for changes in estimates. | 10-15 |
| 18 | Discuss limitations of the estimates. Include a discussion of any modelling assumptions or data limitations that affect interpretation of the estimates. | 15 |
